# Supplementary material
Source: publisher figshare collection journal article supplement (https://frontiersin.figshare.com/ndownloader/files/17461919)
Supplement: Supplementary file [file 17461919]

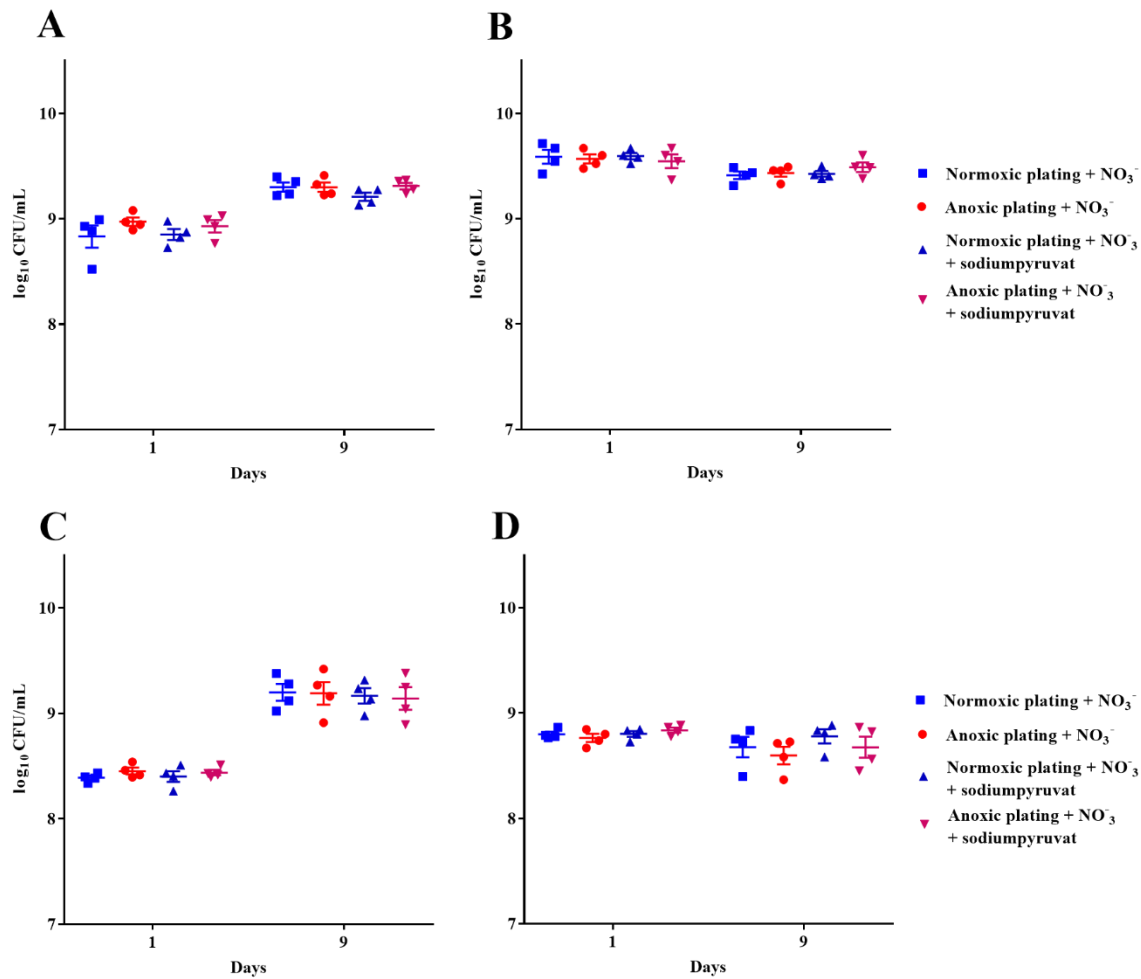

### S3 – Anoxic conditioning did not affect *Escherichia coli* or *Enterococcus faecalis* during growth in the filter biofilm model.

Normoxic and anoxic ( $\pm$  sodium pyruvate) determination of CFU/mL were determined for 1- and 9-day-old anoxically (A) and normoxically (B) conditioned filters with *E. coli* and anoxically (C) and normoxically (D) conditioned filters with *E. faecalis*. No difference between types of plating (One-way ANOVA test). Symbols with error bars indicate the mean  $\pm$  SEM ( $n = 4$ ). +NO<sub>3</sub><sup>-</sup> refers to the addition of 10 mM KNO<sub>3</sub> to LB agar plates.
